# Supplementary material for: Comparing Single and Multiple Imputation Approaches for Missing Values in Univariate and Multivariate Water Level Data
Source: MDPI journal article supplement (doi:10.3390/w15081519), 2023-04-13
Supplement: s1 [file s1]

Archive with 1 entries (1 files):
- water-2292599-supplementary.pdf
