# Supplementary material for: Comparing Single and Multiple Imputation Approaches for Missing Values in Univariate and Multivariate Water Level Data
Source: MDPI journal article supplement (doi:10.3390/w15081519), 2023-04-13
Supplement: s1 [file s1 › water-2292599-supplementary.pdf]

Article

# Comparing Single and Multiple Imputation Approaches for Missing Values in Univariate and Multivariate Water Level Data

Nura Umar <sup>1,2</sup> and Alison Gray <sup>1,\*</sup>

<sup>1</sup> Department of Mathematics and Statistics, University of Strathclyde, Glasgow G1 1XH, UK

<sup>2</sup> Department of Mathematics and Statistics, Umaru Musa Yar'adua University, Katsina 820102, Nigeria

\* Correspondence: a.j.gray@strath.ac.uk

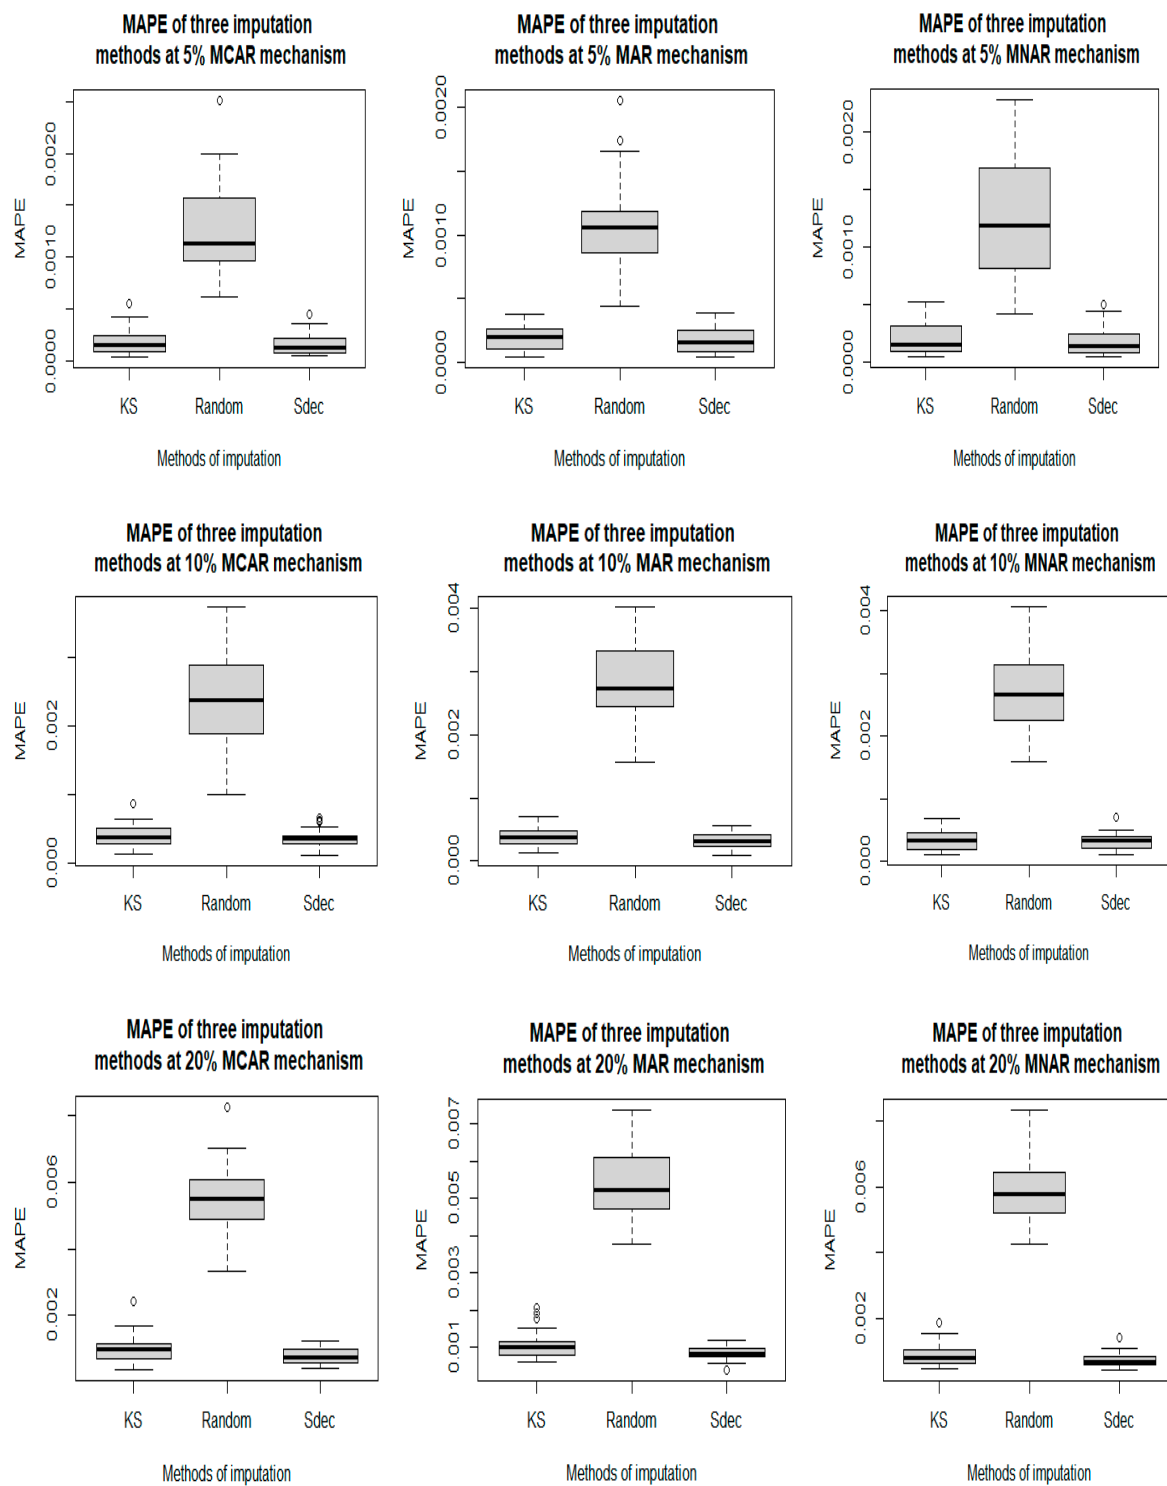

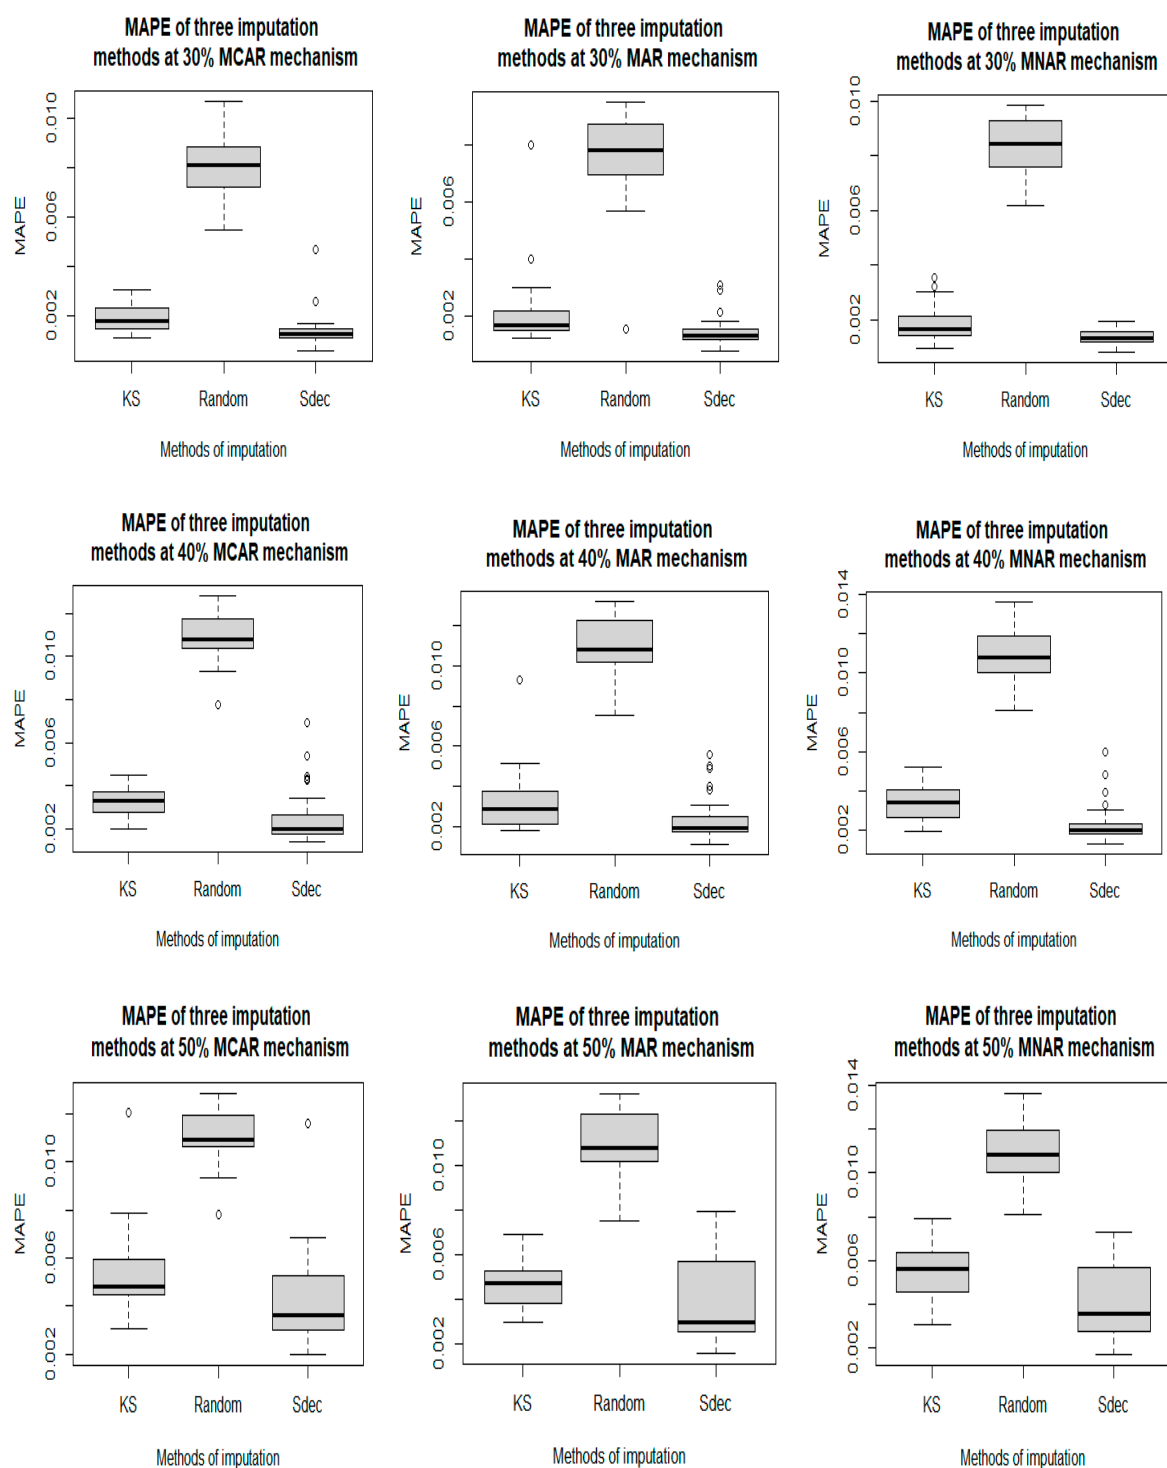

**Figure S1.** Boxplots of MAPE values for Kalman smoothing (KS), random, and seasonal decomposition (Sdec) methods at 5%, 10%, 20%, 30%, 40%, and 50% levels of missingness respectively for the missing completely at random (MCAR), missing at random (MAR) and missing not at random (MNAR) missing value mechanisms.

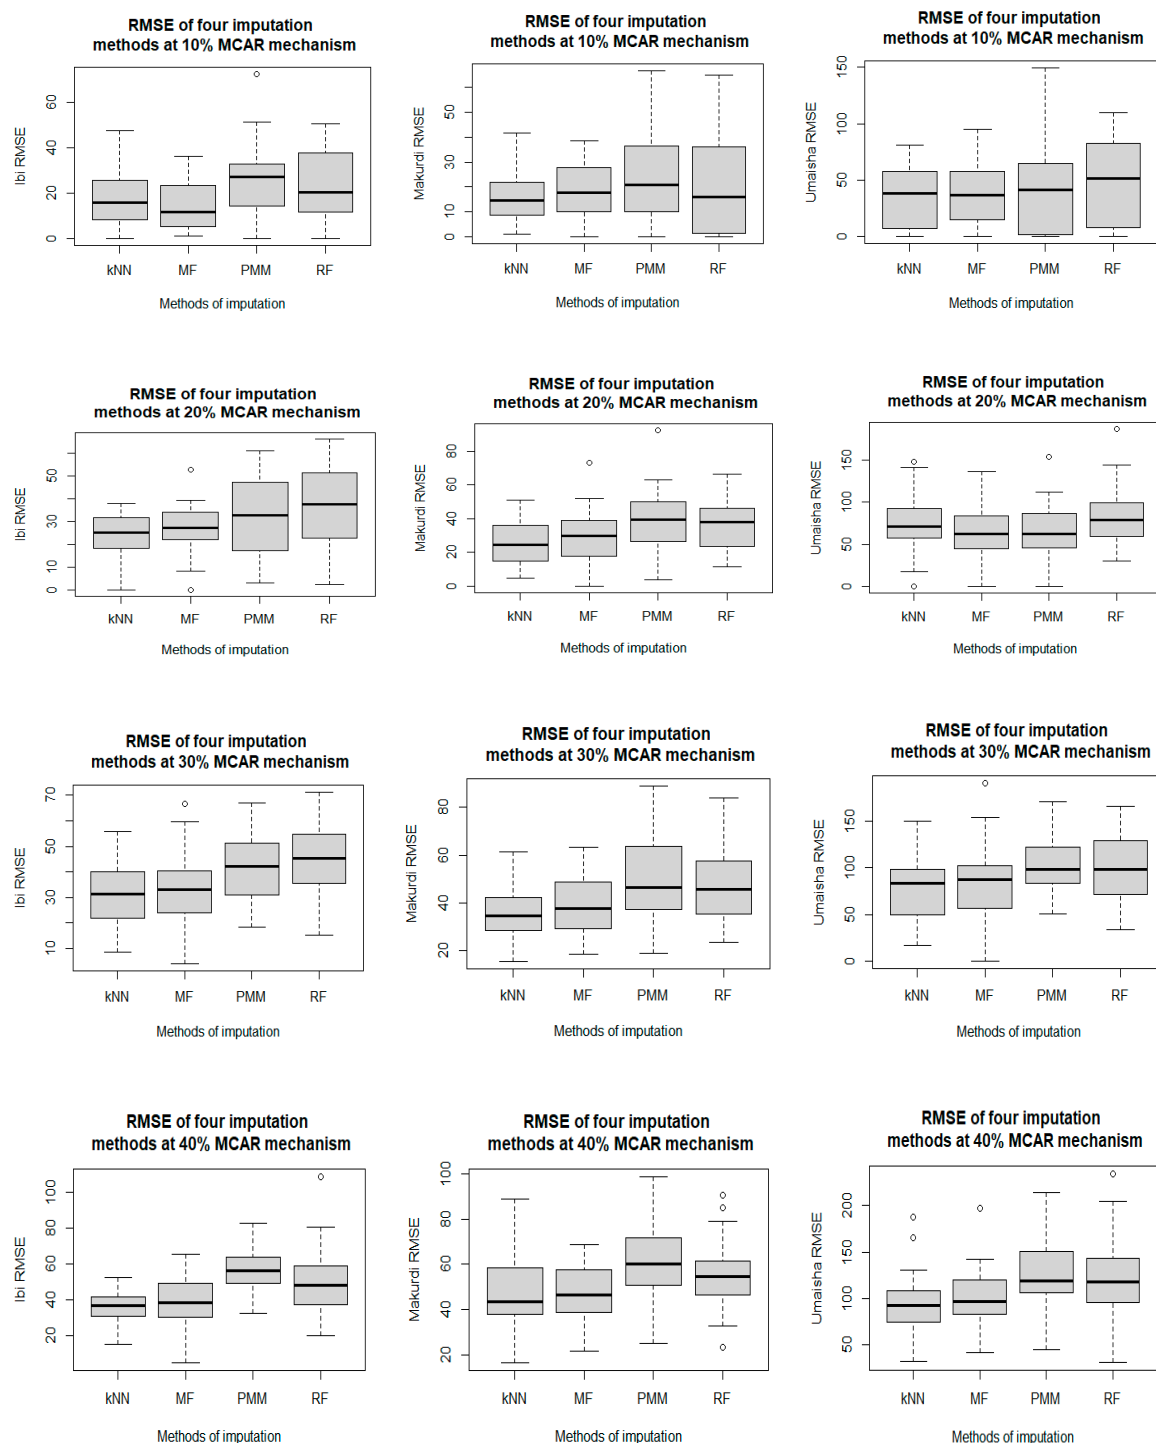

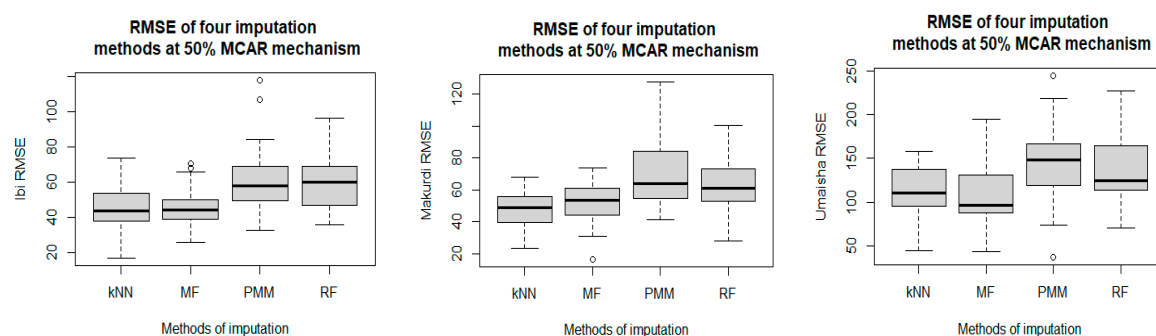

**Figure S2.** Boxplots of RMSE values for k nearest neighbour (kNN), missForest (MF), predictive mean matching (PMM) and random forest (RF) methods at 10%, 20%, 30%, 40%, and 50% levels of missingness respectively for the missing completely at random (MCAR) missing value mechanism.

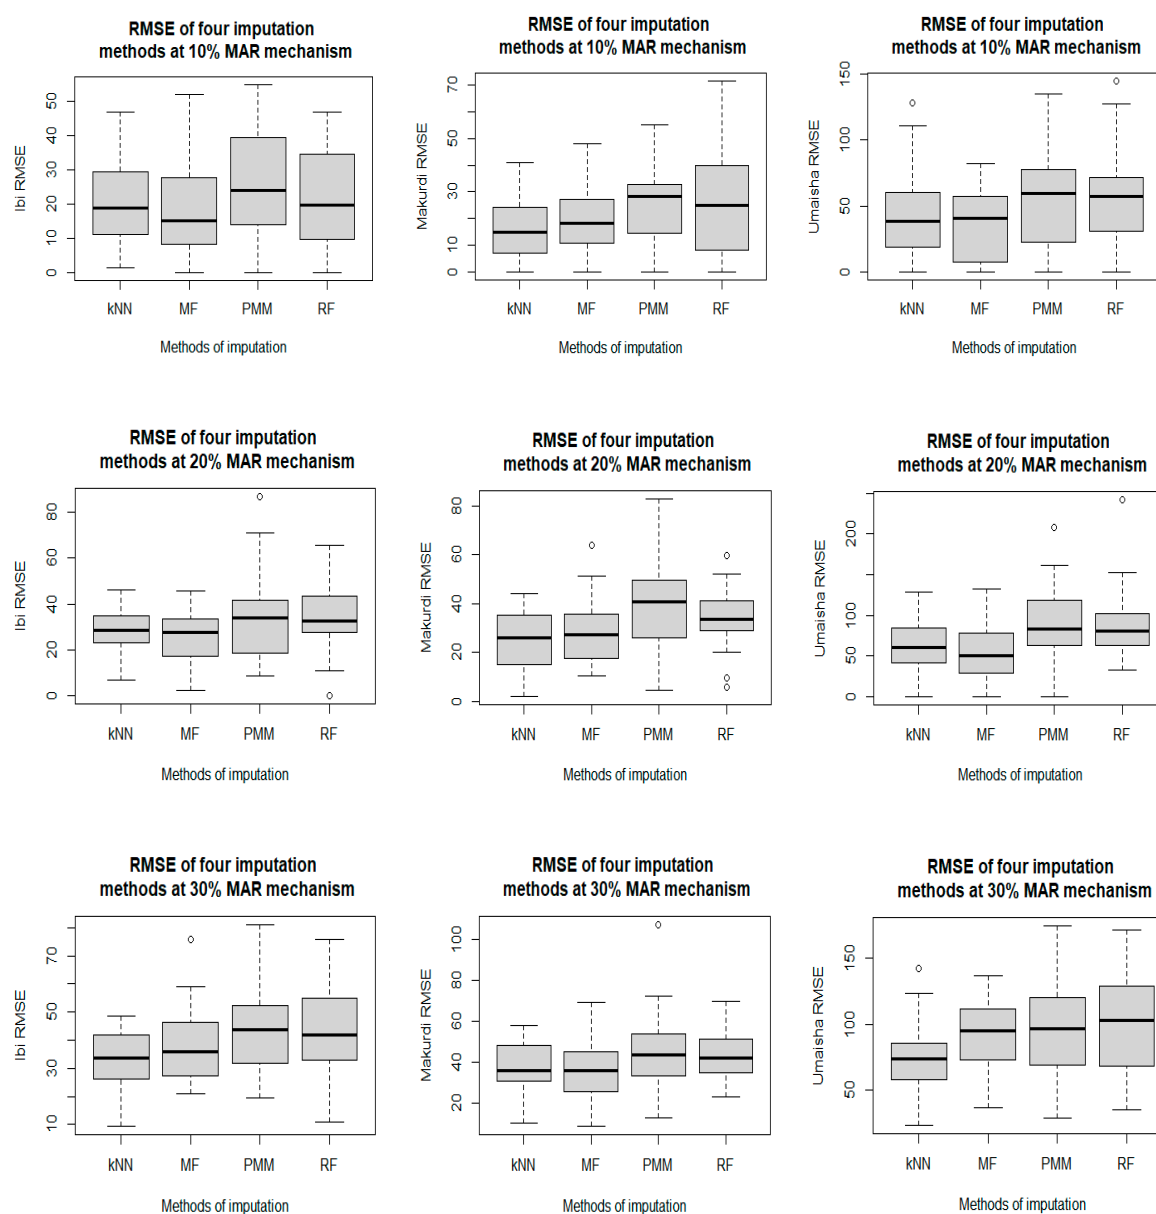

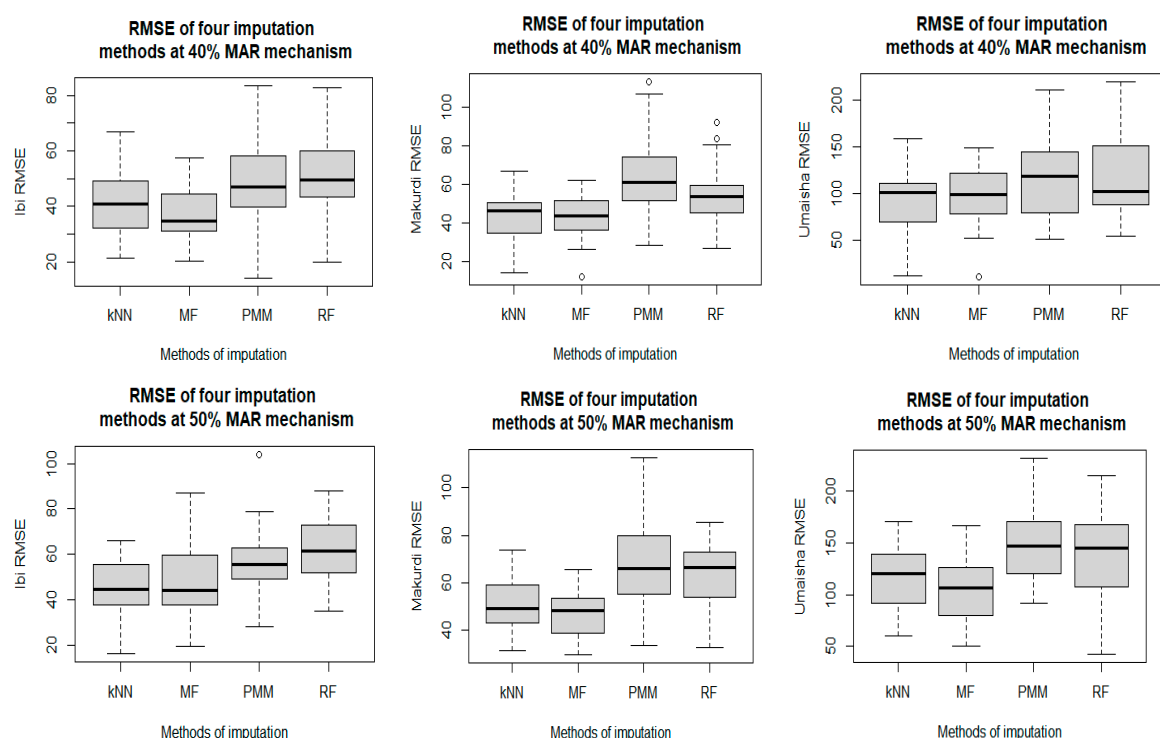

**Figure S3.** Boxplots of RMSE values for k nearest neighbour (kNN), missForest (MF), predictive mean matching (PMM) and random forest (RF) methods at 10%, 20%, 30%, 40%, and 50% levels of missingness respectively for the missing at random (MAR) missing value mechanism.

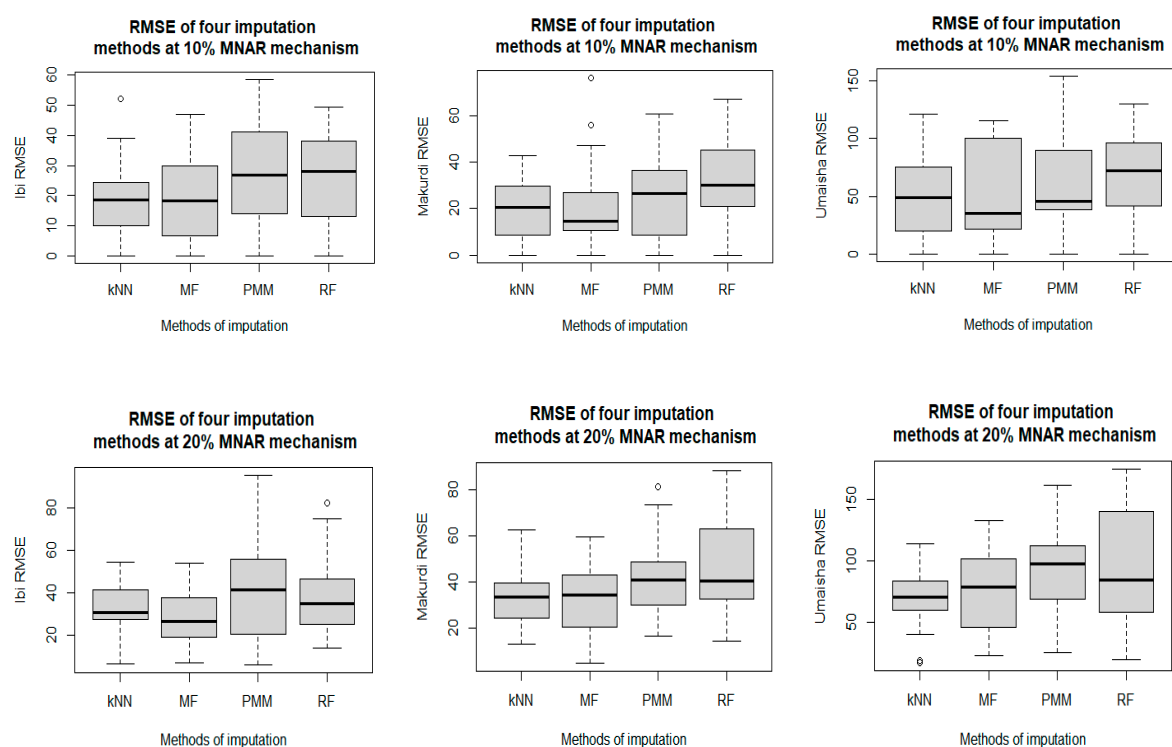

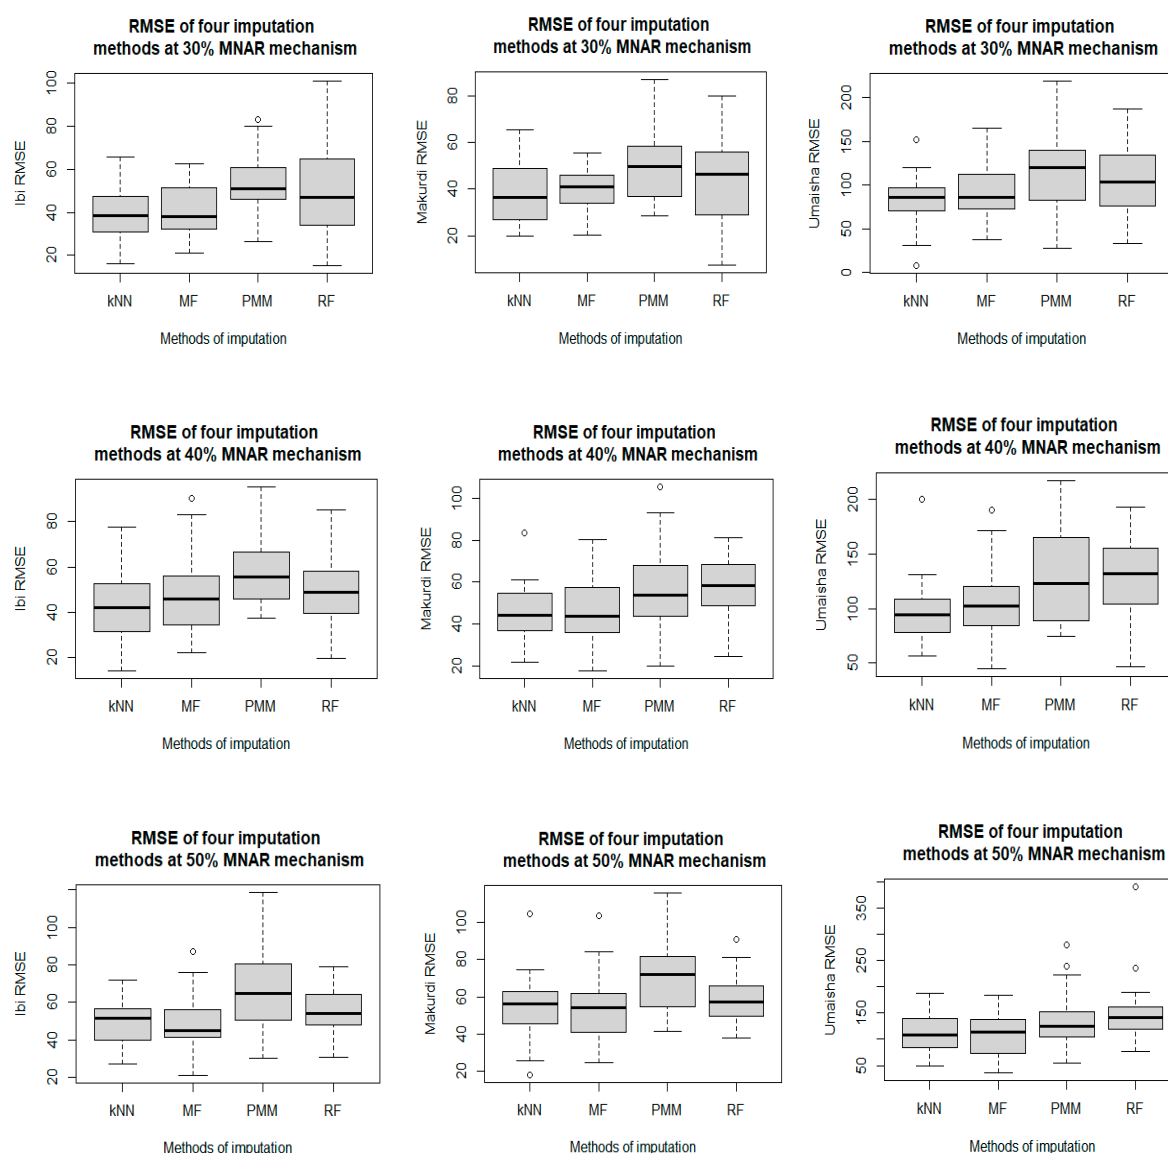

**Figure S4.** Boxplots of RMSE values for k nearest neighbour (kNN), missForest (MF), predictive mean matching (PMM) and random forest (RF) methods at 10%, 20%, 30%, 40%, and 50% levels of missingness respectively for the missing not at random (MNAR) missing value mechanism.

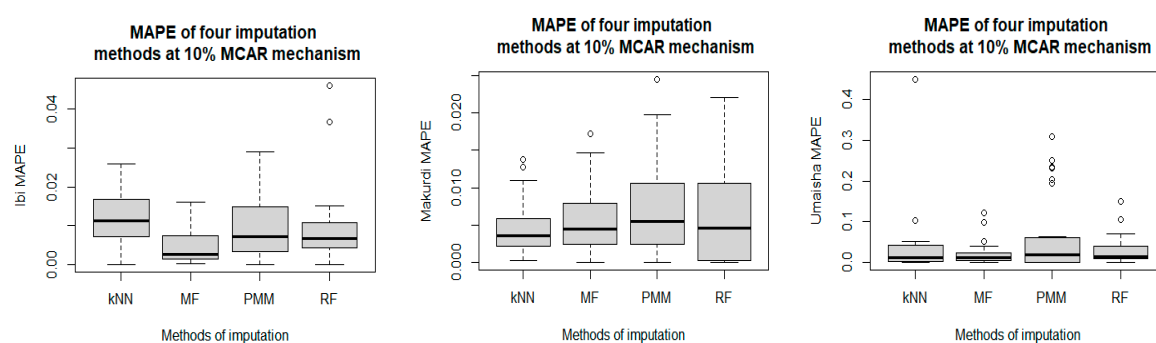

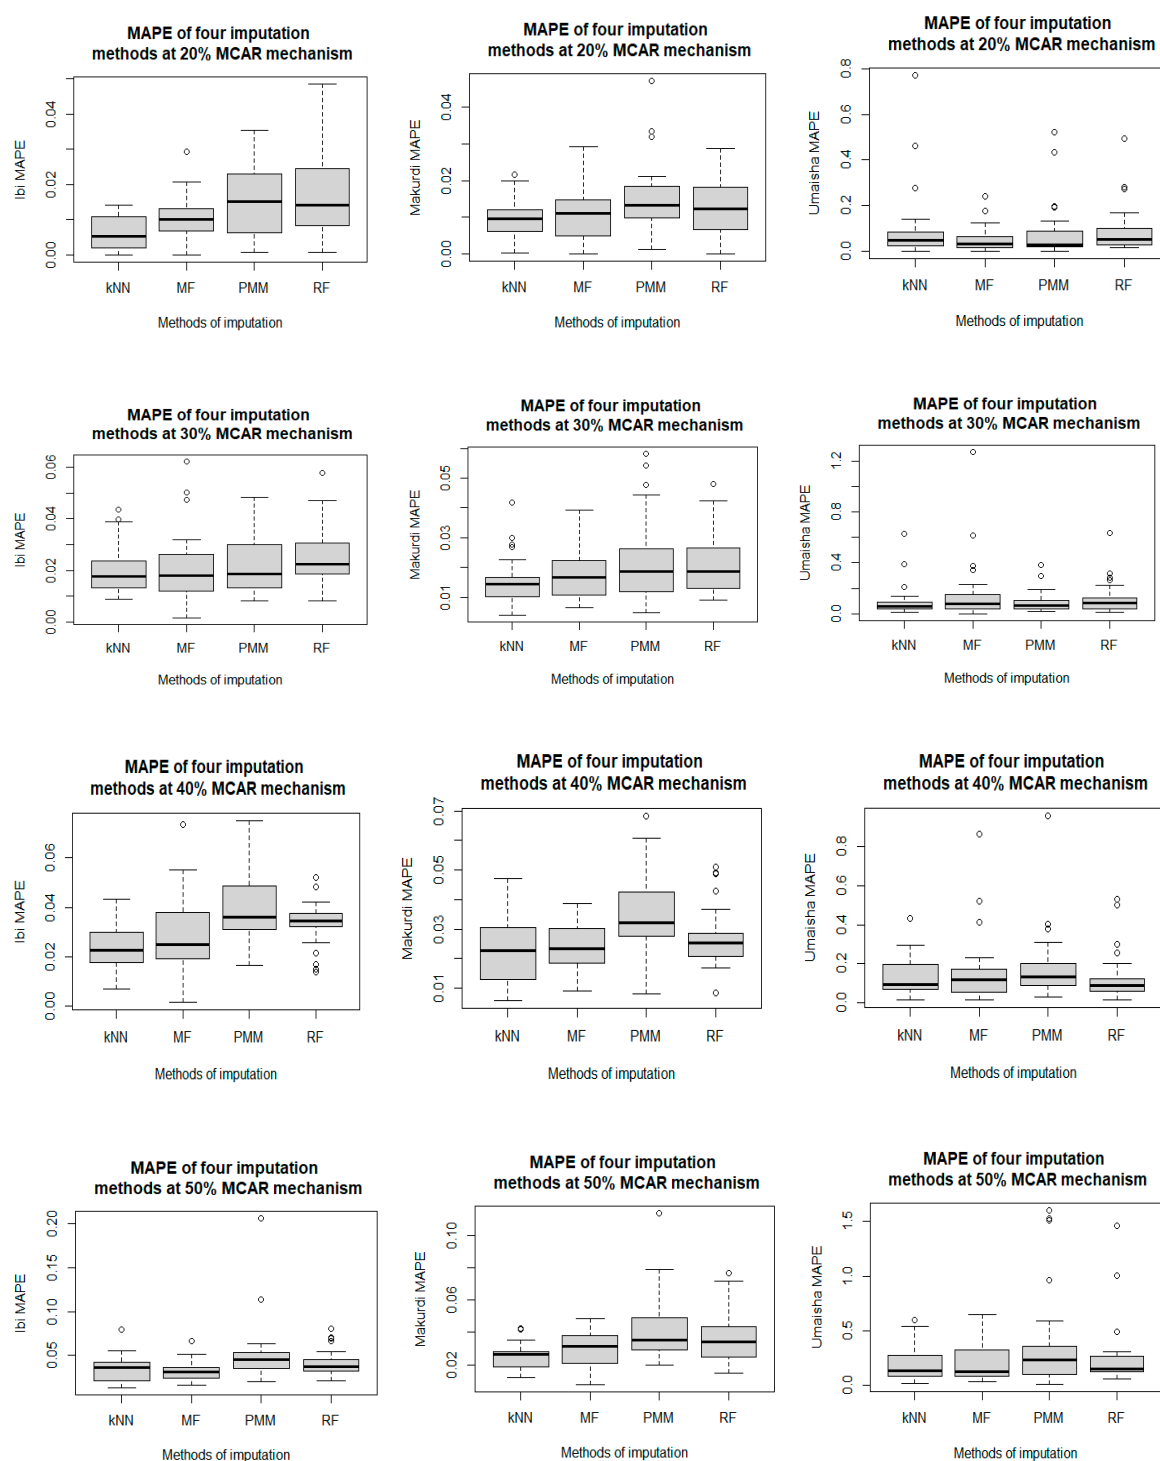

**Figure S5.** Boxplots of MAPE values for k nearest neighbour (kNN), missForest (MF), predictive mean matching (PMM) and random forest (RF) methods at 10%, 20%, 30%, 40%, and 50% of missingness respectively for the missing completely at random (MCAR) missing value mechanism.

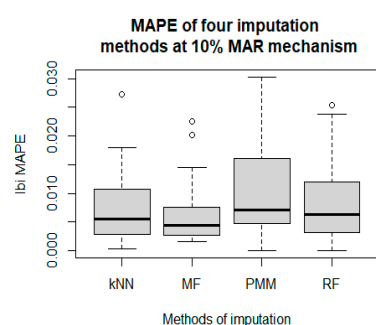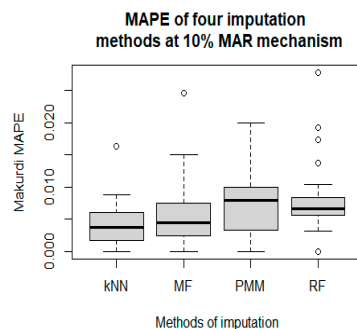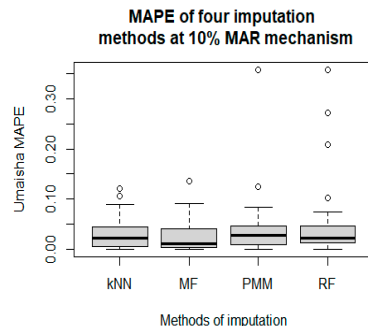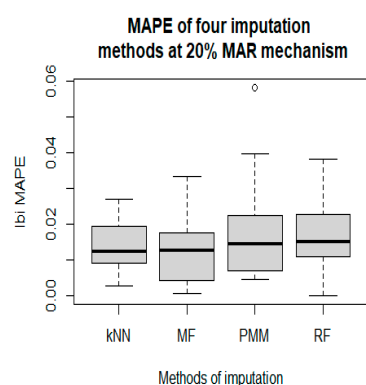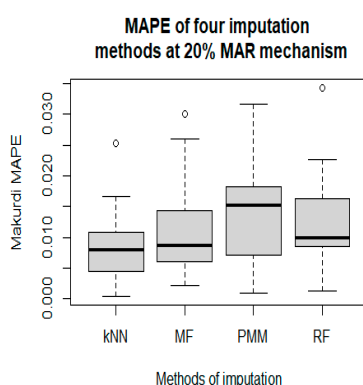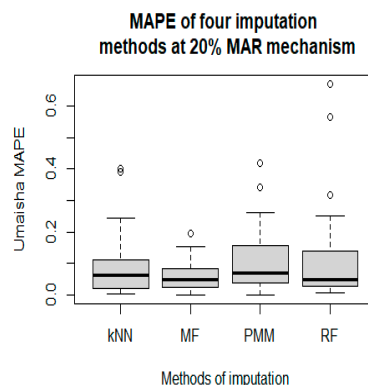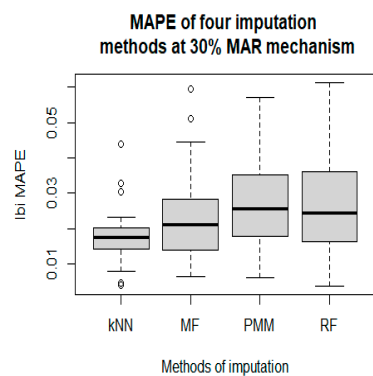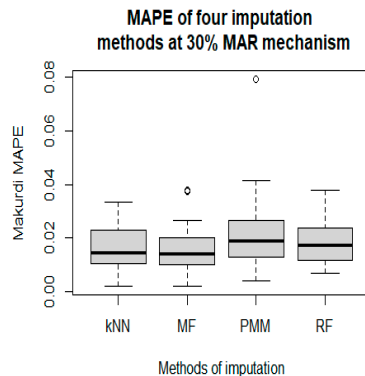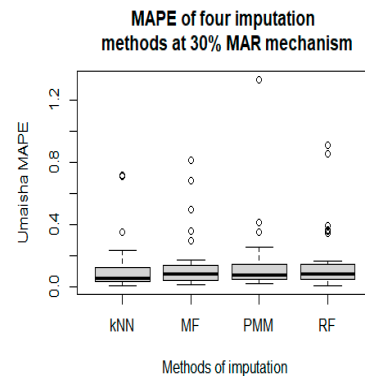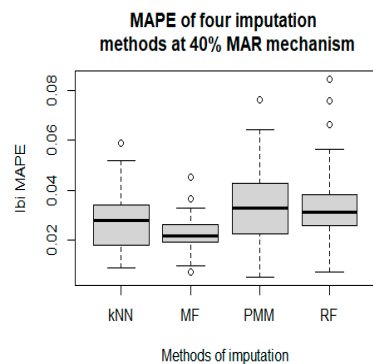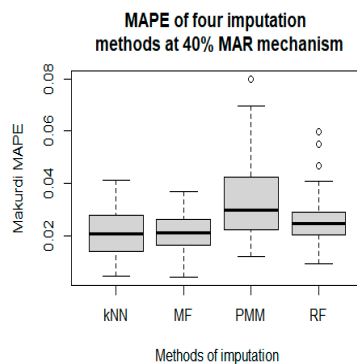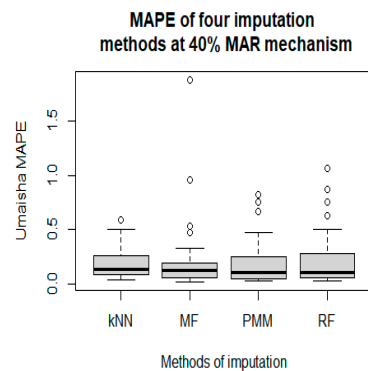

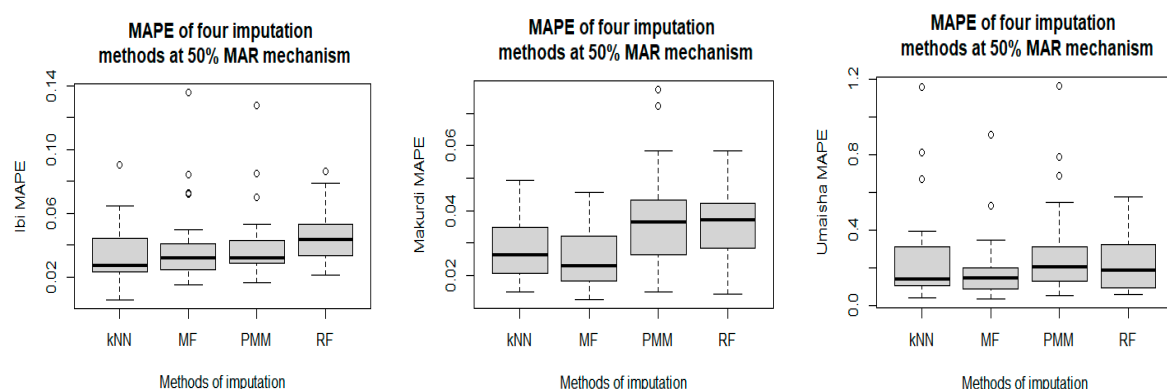

**Figure S6.** Boxplots of MAPE values for k nearest neighbour (kNN), missForest (MF), predictive mean matching (PMM) and random forest (RF) methods at 10%, 20%, 30%, 40%, and 50% levels of missingness respectively for the missing at random (MAR) missing value mechanism.

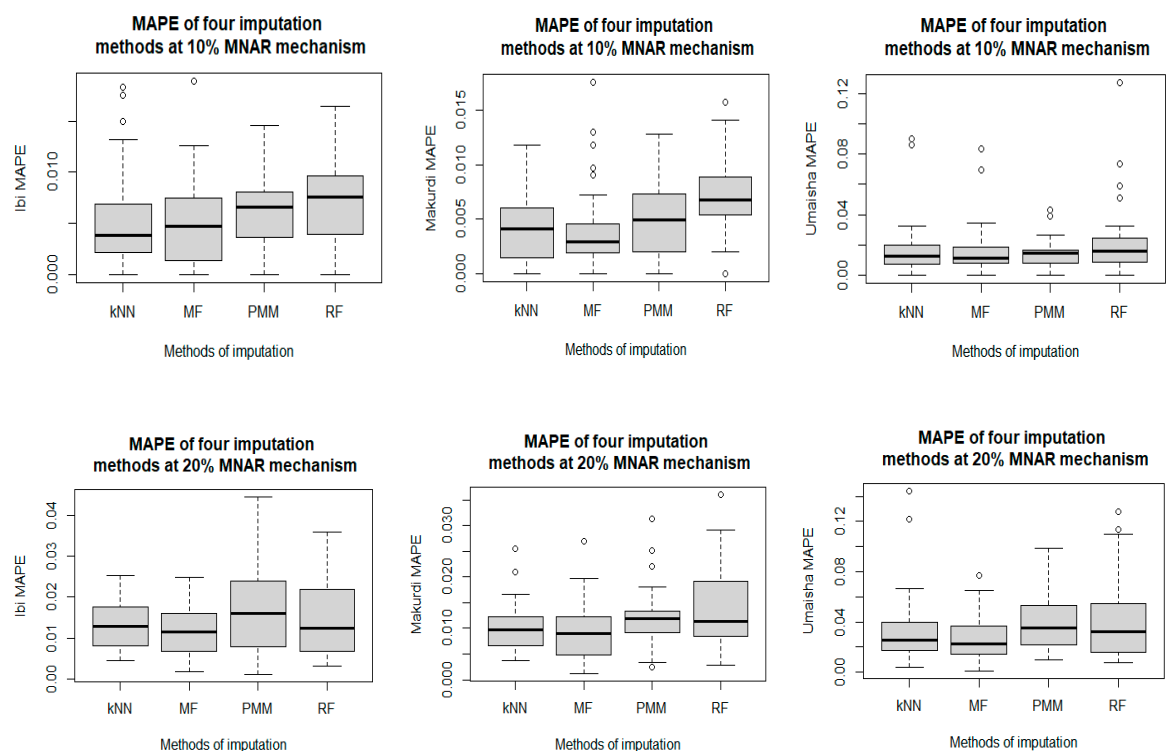

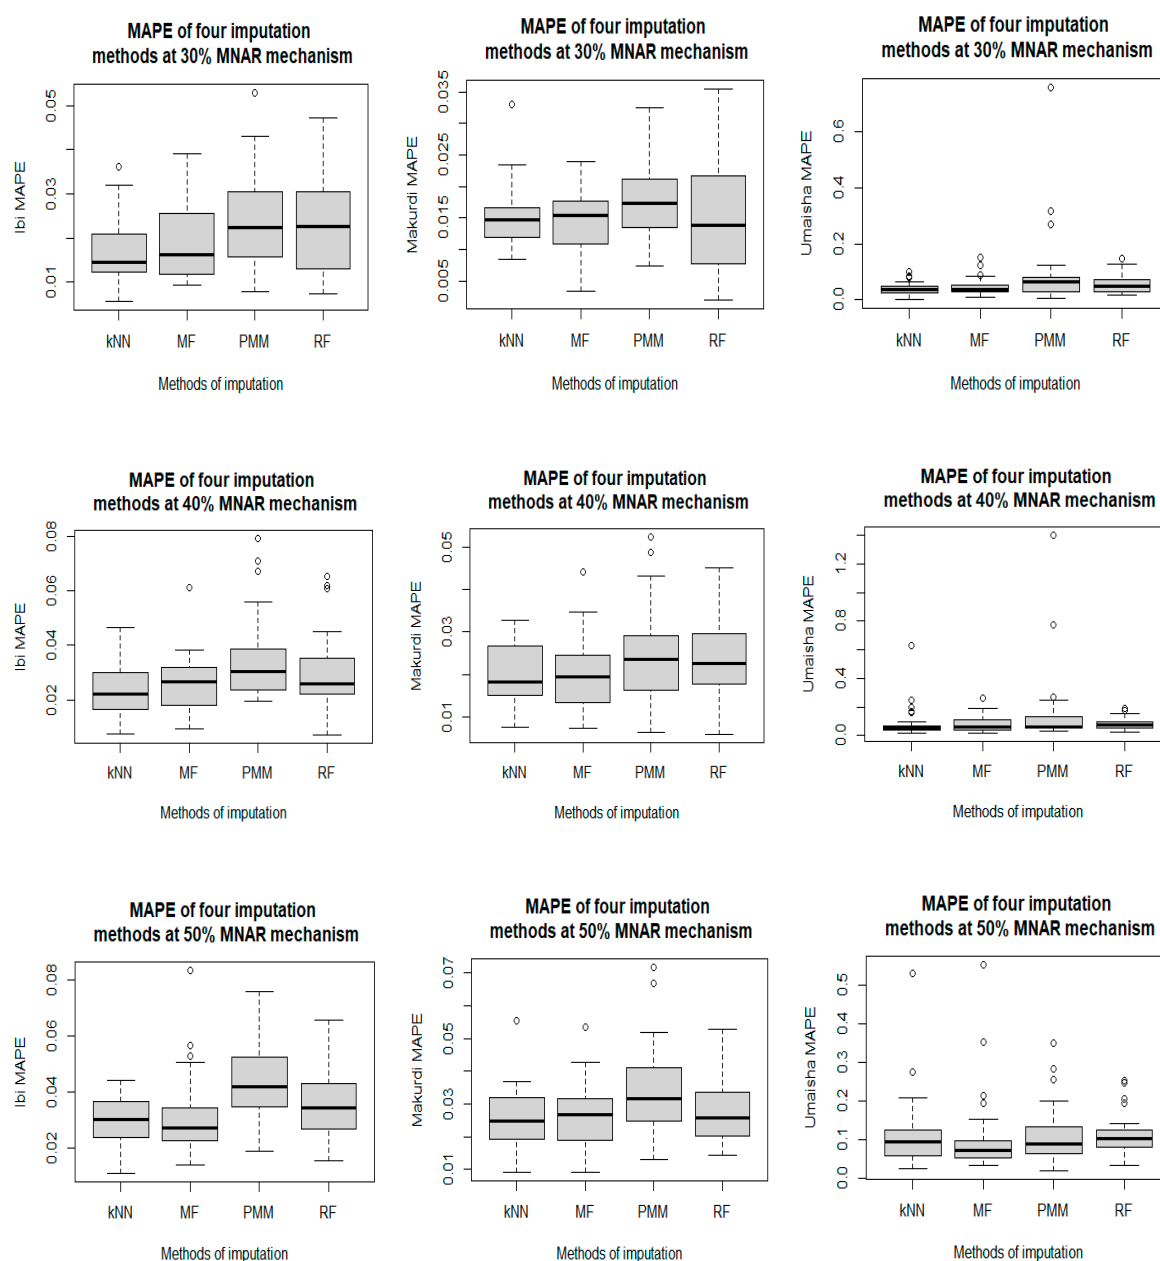

**Figure S7.** Boxplots of MAPE values for k nearest neighbour (kNN), missForest (MF), predictive mean (PMM) and random forest (RF) methods at 10%, 20%, 30%, 40%, and 50% levels of missingness respectively for the missing not at random (MNAR) missing value mechanism.
